# Supplementary material
Source: HighWire-hosted journal article supplement (http://pharmrev.aspetjournals.org/highwire/filestream/21442/field_highwire_adjunct_files/0/SupplementaryTableBader.pdf)
Supplement: SupplementaryTableBader.pdf [file SupplementaryTableBader.pdf]

## Supplementary Table 1

Database identifiers and gene symbols of the 85 proteins used for Figure 1.

| Species           | Gene symbol | Entrez gene id | Homologene | Protein      | aa  | gene synonyms | PSIBLAST evidence | Rank back |
|-------------------|-------------|----------------|------------|--------------|-----|---------------|-------------------|-----------|
| Homo sapiens      | MRGPRX3     | 117195         | 79615      | NP_473372    | 322 |               |                   |           |
| Pan troglodites   | MRGPRX3     | 466454         | 79615      | XP_001172934 | 322 |               |                   |           |
| Macacca mulatta   | MRGPRX3     | 692077         | 79615      | NP_001035511 | 322 |               |                   |           |
| Mus musculus      | Mrgpra9     | 668725         | 79615      | NP_001171037 | 331 |               |                   |           |
| Mus musculus      | Mrgpra2a    | 668727         | 79615      | NP_001166059 | 331 |               |                   |           |
| Mus musculus      | Mrgpra1     | 233221         | 79615      | NP_694735    | 331 |               |                   |           |
| Mus musculus      | Mrgpra2b    | 235712         | 79615      | NP_694741    | 331 | MrgA2         |                   |           |
| Rattus norvegicus | Mrgprx3     | 252960         | 79615      | NP_665730    | 331 |               |                   |           |
| Homo sapiens      | MRGPRX1     | 259249         | 86246      | NP_671732    | 322 |               |                   |           |
| Pan troglodites   | MRGPRX1     | 451070         | 86246      | XP_001173536 | 322 |               |                   |           |
| Macacca mulatta   | MRGPRX1     | 692101         | 86246      | NP_001035707 | 322 |               |                   |           |
| Mus musculus      | Mrgprb2     | 243979         | 86246      | NP_780740    | 338 | MrgB6         |                   |           |
| Rattus norvegicus | Mrgprb2     | 502338         | 86246      | XP_577804    | 312 |               |                   |           |
| Homo sapiens      | MRGPRX4     | 117196         | 86184      | NP_473373    | 322 |               |                   |           |
| Pan troglodites   | MRGPRX4     | 466456         | 86184      | XP_521855    | 322 |               |                   |           |
| Macacca mulatta   | MRGPRX4     | 692123         | 86184      | NP_001035708 | 322 |               |                   |           |
| Mus musculus      | Mrgprx1     | 404242         | 86184      | NP_997423    | 322 |               |                   |           |
| Rattus norvegicus | Mrgprx1     | 282547         | 86184      | NP_750845    | 337 |               |                   |           |
| Gallus gallus     | LOC430433   | 430433         | 86184      | XP_427992    | 282 |               |                   |           |
| Gallus gallus     | LOC776507   | 776507         | 86184      | XP_001236025 | 305 |               |                   |           |
| Gallus gallus     | MRGPRH      | 425998         | 86184      | XP_423677    | 317 |               |                   |           |
| Homo sapiens      | MRGPRX2     | 117194         | 24986      | NP_473371    | 330 |               |                   |           |
| Pan troglodites   | MRGPRX2     | 466465         | 24986      | XP_521864    | 329 |               |                   |           |
| Macacca mulatta   | MRGPRX2     | 691078         | 24986      | NP_001035512 | 329 |               |                   |           |
| Mus musculus      | Mrgprb1     | 233231         | 24986      | NP_991379    | 350 |               |                   |           |
| Mus musculus      | Mrgprx2     | 243978         | 24986      | NP_001030040 | 352 |               |                   |           |
| Rattus norvegicus | Mrgprx2     | 406640         | 24986      | NP_001002280 | 294 | MrgB10        |                   |           |

|                   |      |        |      |              |     |
|-------------------|------|--------|------|--------------|-----|
| Homo sapiens      | MAS1 | 4142   | 1782 | NP_002368    | 325 |
| Pan troglodites   | MAS1 | 472176 | 1782 | XP_527553    | 325 |
| Macacca mulatta   | MAS1 | 703105 | 1782 | XP_001098523 | 325 |
| Mus musculus      | Mas1 | 17171  | 1782 | NP_032578    | 324 |
| Rattus norvegicus | Mas1 | 25153  | 1782 | NP_036889    | 324 |
| Gallus gallus     | MAS1 | 428594 | 1782 | XP_426151    | 329 |

|                    |              |           |      |              |     |                   |           |        |     |          |   |     |          |
|--------------------|--------------|-----------|------|--------------|-----|-------------------|-----------|--------|-----|----------|---|-----|----------|
| Xenopus tropicalis | LOC100485736 | 100485736 | n.a. | XP_002937933 | 330 | best Homo Sapiens | NP_002368 | MAS1   | 90% | 4.00E-60 | 1 | 88% | 7.00E-65 |
| Xenopus tropicalis | LOC101732479 | 101732479 | n.a. | XP_004915725 | 327 | best Homo Sapiens | NP_002368 | MAS1   | 93% | 5.00E-41 | 3 | 92% | 8.00E-41 |
| Xenopus tropicalis | LOC100492446 | 100492446 | n.a. | XP_002936477 | 321 | best Homo Sapiens | NP_002368 | MAS1   | 98% | 2.00E-39 | 4 | 95% | 3.00E-39 |
| Xenopus tropicalis | LOC100492615 | 100492615 | n.a. | XP_002936478 | 355 | best Homo Sapiens | NP_944605 | MRGPRD | 87% | 2.00E-42 | 3 | 89% | 3.00E-33 |
| Xenopus tropicalis | LOC100492282 | 100492282 | n.a. | XP_002936476 | 353 | best Homo Sapiens | NP_002368 | MAS1   | 84% | 8.00E-44 | 6 | 88% | 3.00E-31 |
| Xenopus tropicalis | LOC100494761 | 100494761 | n.a. | XP_002938917 | 331 | best Homo Sapiens | NP_944605 | MRGPRD | 92% | 1.00E-57 | 1 | 95% | 2.00E-60 |
| Xenopus tropicalis | LOC100490494 | 100490494 | n.a. | XP_002937955 | 477 | best Homo Sapiens | NP_001453 | FPR2   | 67% | 3.00E-61 |   |     |          |

|                   |        |        |       |              |     |     |
|-------------------|--------|--------|-------|--------------|-----|-----|
| Homo sapiens      | MRGPRF | 116535 | 17023 | NP_001091985 | 343 |     |
| Pan troglodites   | MRGPRF | 466687 | 17023 | XP_522086    | 343 |     |
| Macacca mulatta   | MRGPRF | 721546 | 17023 | XP_001117722 | 327 |     |
| Mus musculus      | Mrgprf | 211577 | 17023 | NP_663354    | 343 |     |
| Rattus norvegicus | Mrgprf | 266762 | 17023 | NP_714944    | 343 | RTA |

|                   |        |        |       |              |     |
|-------------------|--------|--------|-------|--------------|-----|
| Homo sapiens      | MRGPRD | 116512 | 18893 | NP_944605    | 321 |
| Pan troglodites   | MRGPRD | 466686 | 18893 | XP_522085    | 321 |
| Macacca mulatta   | MRGPRD | 709555 | 18893 | XP_001101665 | 337 |
| Mus musculus      | Mrgprd | 211578 | 18893 | NP_987075    | 321 |
| Rattus norvegicus | Mrgprd | 293648 | 18893 | NP_001001506 | 319 |

|                   |        |        |       |              |     |
|-------------------|--------|--------|-------|--------------|-----|
| Homo sapiens      | MRGPRE | 116534 | 18469 | NP_001034254 | 311 |
| Pan troglodites   | MRGPRE | 466323 | 18469 | XP_521722    | 312 |
| Macacca mulatta   | MRGPRE | 706822 | 18469 | XP_001096746 | 311 |
| Mus musculus      | Mrgpre | 244238 | 18469 | NP_780743    | 310 |
| Rattus norvegicus | Mrgpre | 404660 | 18469 | NP_001002288 | 309 |

|                   |           |        |        |              |     |       |
|-------------------|-----------|--------|--------|--------------|-----|-------|
| Homo sapiens      | MRGPRG    | 386746 | 28580  | NP_001157849 | 289 |       |
| Pan troglodites   | MRGPRG    | 466322 | 28580  | XP_521721    | 289 |       |
| Macacca mulatta   | MRGPRG    | 721253 | 28580  | XP_001117348 | 293 |       |
| Mus musculus      | Mrgprg    | 381974 | 28580  | NP_987077    | 289 |       |
| Rattus norvegicus | Mrgprg    | 309133 | 28580  | NP_982296    | 289 |       |
| Homo sapiens      | MAS1L     | 116511 | 50478  | NP_443199    | 378 |       |
| Pan troglodites   | MAS1L     | 462526 | 50478  | XP_518317    | 403 |       |
| Macacca mulatta   | LOC708687 | 708687 | 50478  | XP_001097172 | 412 |       |
| Mus musculus      | Mrgpra3   | 233222 | 131159 | NP_694707    | 329 |       |
| Mus musculus      | Mrgpra4   | 235854 | 131159 | NP_705744    | 313 |       |
| Mus musculus      | Mrgpra8   | 404237 | n.a.   | NP_997419    | 305 |       |
| Mus musculus      | Mrgpra7   | 404236 | n.a.   | NP_997418    | 305 |       |
| Mus musculus      | Mrgpra6   | 381886 | n.a.   | NP_991390    | 240 |       |
| Mus musculus      | Mrgpra5   | 404235 | n.a.   | NP_997417    | 287 |       |
| Mus musculus      | Mrgprb3   | 404238 | n.a.   | NP_997420    | 312 |       |
| Rattus norvegicus | Mrgprx2l  | 404645 | n.a.   | NP_001002285 | 314 |       |
| Mus musculus      | Mrgprb4   | 233230 | 115575 | NP_991364    | 321 |       |
| Mus musculus      | Mrgprb5   | 404239 | 115575 | NP_997421    | 322 |       |
| Rattus norvegicus | Mrgprb5   | 404644 | 115575 | NP_001002284 | 353 |       |
| Rattus norvegicus | Mrgprb4   | 404658 | 115575 | NP_001002287 | 323 |       |
| Mus musculus      | Mrgprb8   | 404240 | 83620  | NP_997422    | 330 |       |
| Mus musculus      | Mrgprb13  | 620137 | 83620  | XP_889617    | 339 |       |
| Mus musculus      | Mrgprh    | 80978  | 12758  | NP_109651    | 321 | Gpr90 |
| Rattus norvegicus | Mrgprh    | 404641 | 12758  | NP_001002281 | 321 |       |

|                   |      |       |       |           |     |      |
|-------------------|------|-------|-------|-----------|-----|------|
| Homo sapiens      | FPR1 |       |       |           |     |      |
| Pan troglodites   | FPR1 |       |       |           |     |      |
| Macacca mulatta   | FPR1 |       |       |           |     |      |
| Mus musculus      | Fpr1 | 14293 | 20466 | NP_038549 | 364 | FMLP |
| Rattus norvegicus | Fpr1 |       |       |           |     |      |

|              |          |        |             |      |  |  |
|--------------|----------|--------|-------------|------|--|--|
| Mus musculus | Mrgpra19 | 404250 | n.a.        | n.a. |  |  |
| Mus musculus | Mrgpra13 | 404246 | n.a.        | n.a. |  |  |
| Mus musculus | Mrgpra16 | 404249 | n.a.        | n.a. |  |  |
| Mus musculus | Mrgpra12 | 404245 | n.a.        | n.a. |  |  |
| Mus musculus | Mrgpra14 | 404247 | n.a.        | n.a. |  |  |
| Mus musculus | Mrgpra15 | 404248 | n.a.        | n.a. |  |  |
| Mus musculus | Mrgpra11 | 404244 | n.a.        | n.a. |  |  |
| Mus musculus | Mrgpra10 | 404243 | n.a.        | n.a. |  |  |
| Mus musculus | Mrgprb11 | 404251 | <u>n.a.</u> | n.a. |  |  |
